# Supplementary material for: Direct fabrication of photomobile polymer materials with an adhesive-free bilayer structure by electron-beam irradiation
Source: Royal Society of Chemistry journal article supplement (doi:10.1039/c0jm03901b), 2010-12-17
Supplement: c0jm03901b.pdf [file c0jm03901b.pdf]

**Direct Fabrication of Photomobile Polymer Materials  
with an Adhesive-Free Bilayer Structure by Electron-Beam Irradiation**

Yumiko Naka,<sup>a</sup> Jun-ichi Mamiya,<sup>a</sup> Atsushi Shishido,<sup>†a</sup> Masakazu Washio<sup>b</sup> and Tomiki Ikeda<sup>†a</sup>

<sup>a</sup>Chemical Resources Laboratory, Tokyo Institute of Technology, R1-12, 4259 Nagatsuta, Midori-ku, Yokohama 226-8503, Japan

<sup>b</sup>Research Institute for Science and Engineering, Waseda University, 3-4-1 Okubo, Shinjyuku-ku, Tokyo 169-0072, Japan

## Materials

### Synthesis of monomer

The azobenzene monomer, 6-[4-(4-ethoxyphenylazo)phenoxy]hexyl acrylate, was synthesized and purified according to a procedure similar to the literature.<sup>[1]</sup>

<sup>1</sup>H NMR (300 MHz, CDCl<sub>3</sub>):  $\delta$  = 1.43-1.78 (m, 11H), 4.02-4.21 (m, 6H), 5.82 (dd,  $J$  = 10, 2 Hz, 1H), 6.13 (dd,  $J$  = 17, 10 Hz, 1H), 6.41 (dd,  $J$  = 17, 2 Hz, 1H), 6.97-7.00 (m, 4H).

Elemental analysis: Calcd. for C<sub>23</sub>H<sub>28</sub>N<sub>2</sub>O<sub>4</sub>: C, 69.67; H, 7.12; N, 7.07 %. Found: C, 69.58; H, 7.18; N, 7.08 %. MS (FAB) found:  $m/z$  397 [M+1]<sup>+</sup> (396.48 calcd for C<sub>23</sub>H<sub>28</sub>N<sub>2</sub>O<sub>4</sub>).

### Synthesis of polymer

An azobenzene LC polymer (**PAz**) was prepared by bulk polymerization of the monomer (1.19 g, 3.00 mmol) with 2,2'-azobis(*N*-cyclohexyl-2-methylpropionamide) as an initiator (54.6 mg, 0.15 mmol). Firstly, the monomer containing the initiator was injected into a glass cell (size: 14 cm × 14 cm × 30 μm) on a hot plate at 100 °C. The polymerization was carried out in a preheated oven under vacuum for 24 h at 120 °C. After polymerization, the polymer was dissolved in tetrahydrofuran (THF) and precipitated in a large excess of methanol, and finally dried under vacuum. A yellow solid product was obtained with a yield of 94 %. The number-average molecular weight ( $M_n$ ) and polydispersity index ( $M_w/M_n$ ) of the polymer were measured by GPC (Japan Spectroscopy, model DG-980-50; column, Shodex GPC LF804 × 2 + LF804A; eluent, THF) using standard polystyrenes for calibration. The GPC curve of the obtained polymer is shown in **Fig. S1**.

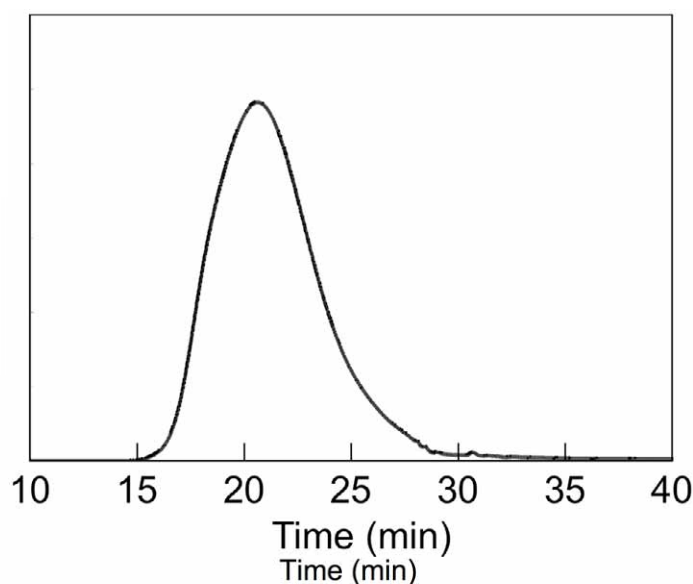

**Figure S1.** A GPC curve of the azobenzene LC polymer (**PAz**).

#### **Electron-beam (EB) irradiation**

The **PAz** monolayer and **PAz/PE** bilayer (**PE**: polyethylene) films were irradiated with soft-EBs from an EB accelerator (Hamamatsu Photonics, EB-ENGINE<sup>®</sup>) at room temperature in a stream of nitrogen with a dose rate of 100 kGy/pass (current: 2 mA, pass speed: 80 mm/s, concentration of oxygen: <100 ppm).

#### **Liquid-crystalline properties of polymer**

The thermodynamic properties of the polymer were analyzed with a DSC (Seiko Instruments Inc., EXTRAR6000, DSC6220) at heating and cooling rates of 10 °C/min. At least three scans were performed to check the reproducibility. The mesomorphic properties were examined with a polarizing optical microscope (POM, Olympus. BX50F4) equipped with a hot stage (Mettler, FP-90 and FP-82). It was found that the polymer exhibited LC phases from 85 to 165 °C upon heating and from 162 to 81 °C upon cooling, and the DSC curve also exhibited a glass transition temperature ( $T_g$ ) of **PAz** at approximately 60 °C before EB irradiation (**Fig. S2a**). After EB irradiation, the peaks of LC-isotropic phase transition disappeared, and the  $T_g$  fell to 40-50 °C (**Fig. S2b**).

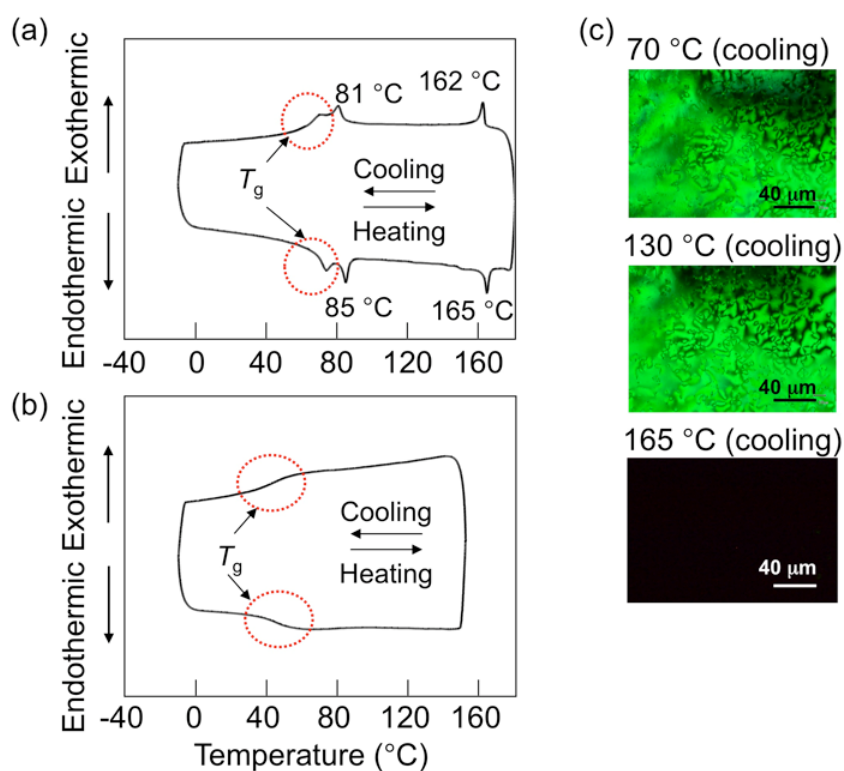

**Figure S2.** DSC thermograms of the azobenzene LC polymer. (a) **PAz**; (b) **PAz** after EB irradiation at a dose of 10 MGy; (c) polarizing optical micrographs of **PAz** at various temperatures.

### Photoisomerization of the EB-crosslinked PAz film

In the EB-crosslinked **PAz** film at 10 MGy, the isomerization of the azobenzene moieties was evaluated in films by UV-vis spectroscopy upon irradiation with UV light from a UV-LED irradiator (Keyence, UV-400, UV-50H) as shown in **Fig. S3**.

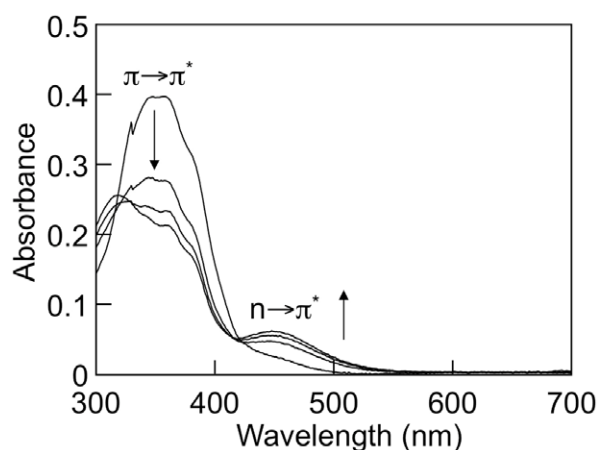

**Figure S3.** A change in UV-vis absorption spectra of the EB-crosslinked **PAz** film at 10 MGy by irradiation with UV light (365 nm, 10 mW/cm<sup>2</sup>).

### **Photoinduced change in alignment of mesogens**

A change in transmittance of the EB-crosslinked **PAz** films at 10 MGy (thickness: ~20 nm) was measured upon exposure to UV light (10 mW/cm<sup>2</sup>) at 50 °C. The optical setup for the evaluation of the photoinduced change in alignment of azobenzene mesogens in films is shown in **Fig. 2a**. The intensity of a probe beam at 633 nm from a He-Ne laser (NEC, GLS5370) transmitted through a pair of crossed polarizers, with the sample film between them, was measured with a photodiode.

### **Recording of movement**

The motions of films were recorded with a three-dimensional digital camera (Omron, VC-HRM20Z and VC1000).

### **Reference**

- [1] A. S. Angeloni, D. Caretti, C. Carlini, E. Chiellini, G. Galli, A. Altomare, R. Solaro, M. Laus, *Liq. Cryst.* **1989**, *4*, 513-527.
